# Supplementary material for: Intrinsic auxeticity and mechanical anisotropy of Si9C15 siligraphene
Source: Royal Society of Chemistry journal article supplement (doi:10.1039/d3nr00026e), 2023-01-01
Supplement: d3nr00026e1.pdf [file d3nr00026e1.pdf]

Supplementary Materials for

**Intrinsic auxeticity and mechanical anisotropy of Si<sub>9</sub>C<sub>15</sub> siligraphene**

Jianli Zhou<sup>||</sup>, Jian Li<sup>||</sup>, Jin Zhang<sup>\*</sup>

School of Science, Harbin Institute of Technology, Shenzhen 518055, PR China

<sup>||</sup>Contributed equally.

<sup>\*</sup>Corresponding author. E-mail address: [jinzhang@hit.edu.cn](mailto:jinzhang@hit.edu.cn) (J. Zhang).

**Tab. S1.** Elastic constants of nonplanar and planar Si<sub>9</sub>C<sub>15</sub> siligraphene

|           | $C_{11}$ (GPa) | $C_{22}$ (GPa) | $C_{12}$ (GPa) | $C_{66}$ (GPa) |
|-----------|----------------|----------------|----------------|----------------|
| Nonplanar | 275.43         | 264.66         | -160.24        | 141.14         |
| Planar    | 488.42         | 488.28         | 151.00         | 167.46         |

**Tab. S2.** A comparison among negative Poisson's ratios of the present Si<sub>9</sub>C<sub>15</sub> siligraphene and some other 2D materials. Here, results of defective graphene, graphene oxide and hydrogenated graphene listed here are the most negative values.

| Material                                            | Poisson's ratio |
|-----------------------------------------------------|-----------------|
| Pristine graphene <sup>a</sup>                      | -0.07           |
| Defective graphene <sup>b</sup>                     | -0.3            |
| Graphene oxide <sup>c</sup>                         | -0.567          |
| Hydrogenated graphene <sup>d</sup>                  | -0.04           |
| Monolayer Si <sub>9</sub> C <sub>15</sub> (present) | -0.12~-0.38     |

<sup>a</sup>Ref. [S1]; <sup>b</sup>Ref. [S2]; <sup>c</sup>Ref. [S3]; <sup>d</sup>Ref. [S4].

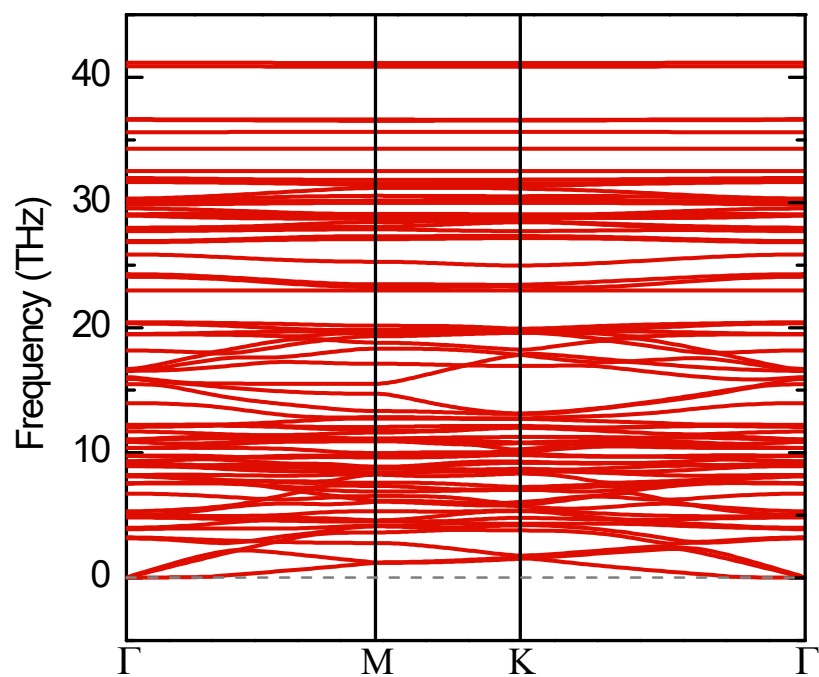

**Fig. S1.** Phonon dispersion of monolayer Si<sub>9</sub>C<sub>15</sub>.

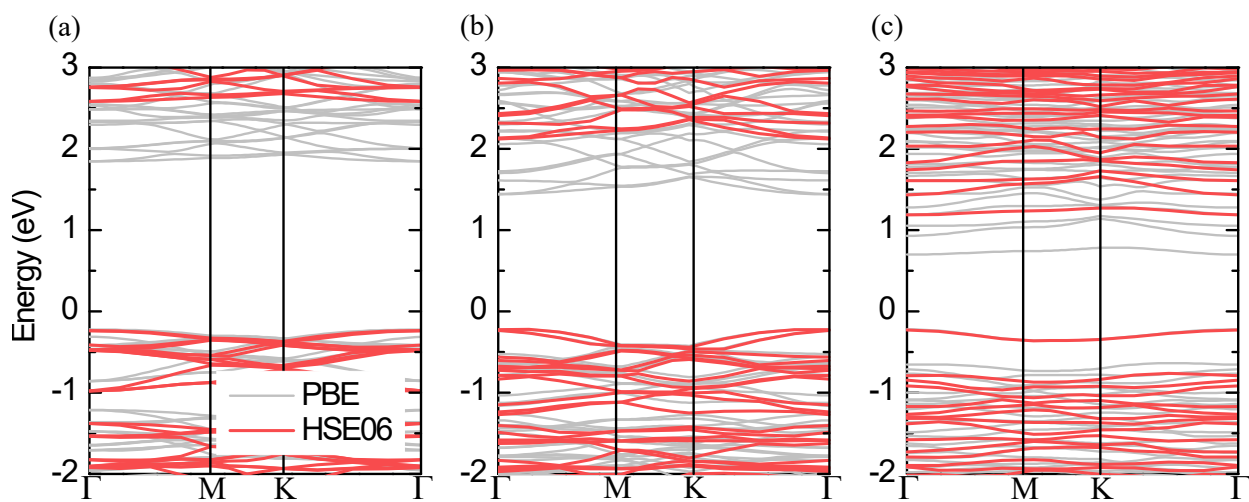

**Fig. S2.** Band structures of monolayer Si<sub>9</sub>C<sub>15</sub> (a) without strain and with strains of (b) 5% and (c) 10% in the  $y$  (or AC) direction.

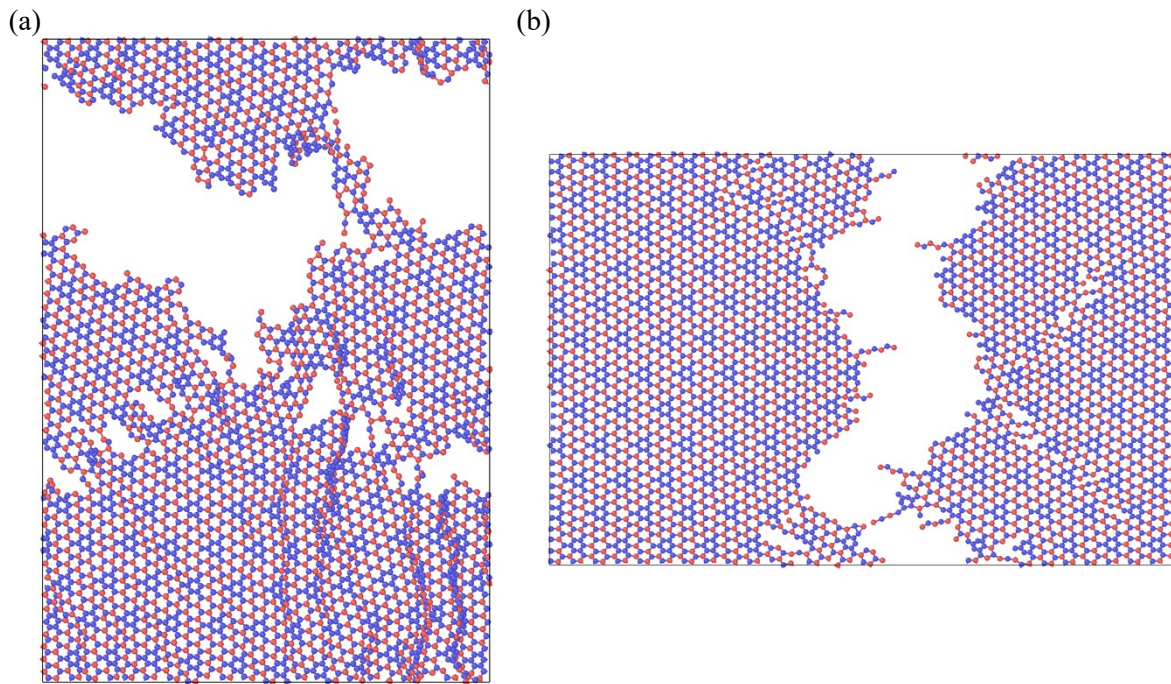

**Fig. S3.** The fractured structures of  $\text{Si}_9\text{C}_{15}$  siligraphene stretched in (a)  $x$  and (b)  $y$  directions.

## References

- [S1] K. V. Zakharchenko, M. I. Katsnelson, A. Fasolino, Finite temperature lattice properties of graphene beyond the quasiharmonic approximation, *Phys. Rev. Lett.* 102 (2009) 046808.
- [S2] J. N. Grima, S. Winczewski, L. Mizzi, M. C. Grech, R. Cauchi, R. Gatt, D. Attard, K. W. Wojciechowski, J. Rybicki, Tailoring graphene to achieve negative Poisson's ratio properties, *Adv. Mater.* 27 (2015) 1455-1459.
- [S3] J. Wan, J.-W. Jiang, H. S. Park, Negative Poisson's ratio in graphene oxide, *Nanoscale* 9 (2017) 4007-4012.
- [S4] J. W. Jiang, T. Chang, X. Guo, Tunable negative Poisson's ratio in hydrogenated graphene, *Nanoscale* 8 (2016) 15948-15953.
